# Supplementary material for: Road traffic noise and children’s inattention
Source: PubMed Central journal article supplement (PMC5698983; doi:10.1186/s12940-017-0337-y), 2017-11-21

# Additional File 1

Road traffic noise and children's inattention

Directed acyclic graphs for pregnancy sample

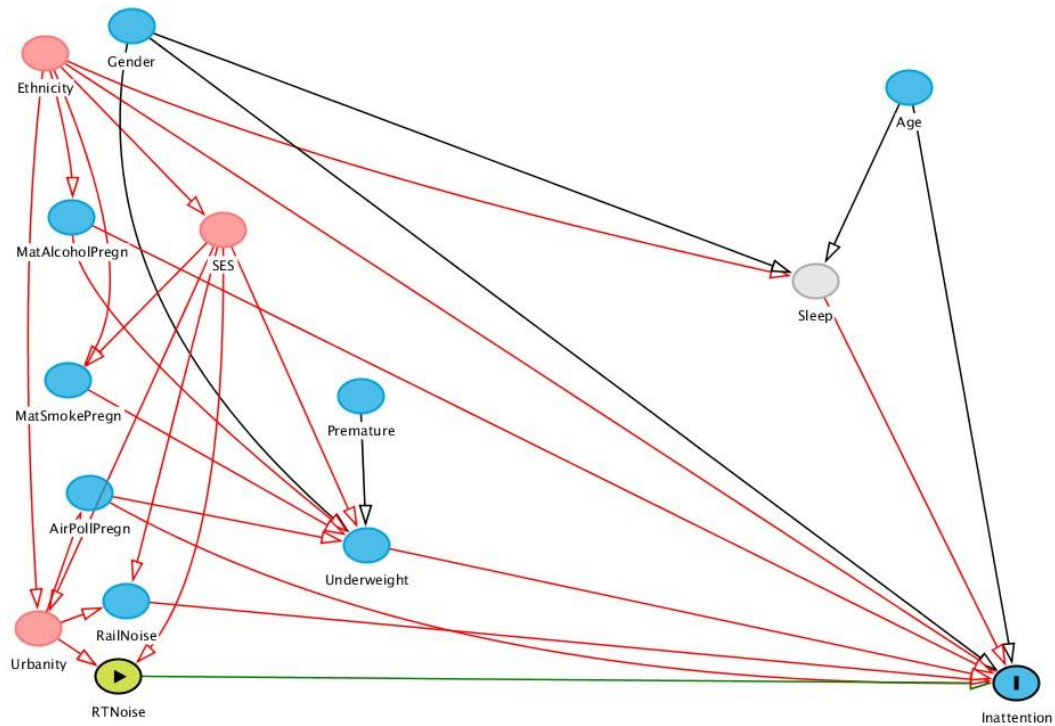

Supplement: 12940_2017_337_MOESM1_ESM.pdf [file 12940_2017_337_MOESM1_ESM.pdf]
